# Supplementary material
Source: MDPI journal article supplement (https://www.mdpi.com/2227-9717/10/11/2384)
Supplement: s1 [file s1]

# Supplementary Material

## Predicting Enthalpy of Combustion using Machine Learning

Abdul Gani Abdul Jameel <sup>1,2,3,\*</sup>, Ali Al-Muslem <sup>1</sup>, Nabeel Ahmad <sup>2</sup>, Awad B.S. Alquaity <sup>4,5,\*</sup>, Umer Zahid <sup>1,6</sup>, Usama Ahmed <sup>1,5</sup>

- 1 Department of Chemical Engineering, King Fahd University of Petroleum & Minerals, Dhahran 31261, Saudi Arabia
- 2 Center for Refining and Advanced Chemicals, King Fahd University of Petroleum & Minerals, Dhahran 31261, Saudi Arabia
- 3 SDAIA-KFUPM Joint Research Center for Artificial Intelligence, Dhahran 31261, Saudi Arabia
- 4 Department of Mechanical Engineering, King Fahd University of Petroleum & Minerals, Dhahran 31261, Saudi Arabia
- 5 Interdisciplinary Research Center for Hydrogen and Energy Storage, King Fahd University of Petroleum & Minerals, Dhahran 31261, Saudi Arabia
- 6 Interdisciplinary Research Center for Membranes & Water Security, King Fahd University of Petroleum and Minerals, Dhahran 31261, Saudi Arabia

Correspondence: a.abduljameel@kfupm.edu.sa; awad.alquaity@kfupm.edu.sa

**Table S1.** Enthalpy of combustion for surrogates Edwards & Maurice, 2001 [17].

| Surrogate                       | S1      | S2    | S3    | S4    | S5   |
|---------------------------------|---------|-------|-------|-------|------|
| Enthalpy of Combustion (BTU/lb) | 18700   | 18530 | 18580 | 18650 | 43.3 |
| Compounds                       | Vol (%) |       |       |       |      |
| n-hexane                        | 5.5     | -     | -     | -     | -    |
| Cyclohexane                     | 8       | -     | -     | -     | -    |
| n-heptane                       | 8       | -     | -     | -     | -    |
| Methyl cyclohexane              | 8       | -     | 7.5   | -     | 20   |
| Toluene                         | 8       | -     | -     | -     | -    |
| n-octane                        | 8       | -     | -     | -     | -    |
| n-nonane                        | 10      | -     | -     | -     | -    |
| Cyclooctane                     | 8       | -     | 6.6   | -     | -    |
| n-decane                        | 10      | 2.5   | 15.6  | -     | -    |
| Decalin                         | 5       | 11.5  | -     | -     | -    |
| Tetralin                        | 1       | 9.5   | 5.6   |       | 5    |
| n-dodecane                      | 10      | -     | 17.4  | 6     | 30   |
| 1-methyl naphthalene            | 0.5     | -     | 5.2   | -     | -    |
| n-tetradecane                   | 10      | -     | 11.2  | -     | -    |
| iso-octane                      | -       | -     | 6.5   | -     | 10   |
| m-xylene                        | -       | -     | 6.9   | -     | 15   |
| Butyl benzene                   | -       | -     | 5.5   | -     | -    |
| 1,2,4,5 tetramethyl benzene     | -       | -     | 5.5   | -     | -    |
| Dodecane                        | -       | 25    | -     | -     | -    |
| 1-methyl naphthalene            | -       | 1.5   | -     | -     | -    |
| Hexadecane                      | -       | -     | 6.5   | -     | -    |
| n-undecane                      | -       | -     | -     | 4.7   | -    |
| n-pentylcyclohexane             | -       | 11    | -     | -     | -    |
| 1,3-diisopropylbenzene          | -       | 3     | -     | -     | -    |
| 1-phenyl hexane                 | -       | 5     | -     | -     | -    |
| n-tridecane                     | -       | 10    | -     | 18.8  | -    |
| n-heptylcyclohexane             | -       | 11    | -     | -     | -    |
| n-tetradecane                   | -       | 5     | -     | 12.5  | 20   |
| n-pentadecane                   | -       | 5     | -     | -     | -    |
| n-hexylcyclopentane             | -       | -     | -     | 2.7   | -    |
| n-heptylcyclopentane            | -       | -     | -     | 3.6   | -    |
| n-octyl cyclopentane            | -       | -     | -     | 11.2  | -    |

|                     |     |     |     |      |     |
|---------------------|-----|-----|-----|------|-----|
| n-nonylcyclopentane | -   | -   | -   | 7.5  | -   |
| Bicycloparaffin 1   | -   | -   | -   | 11.3 | -   |
| Bicycloparaffin 2   | -   | -   | -   | 14.7 | -   |
| Pentamethyl benzene | -   | -   | -   | 1.3  | -   |
| Hexamethylbenzene   | -   | -   | -   | 1.7  | -   |
| Dimethylnaphthalene | -   | -   | -   | 4    | -   |
| <b>Total</b>        | 100 | 100 | 100 | 100  | 100 |

**Table S2.** Enthalpy of combustion for surrogates Huber et al. (2009) [18].

| Surrogates                      | S6      | S7   |
|---------------------------------|---------|------|
| Enthalpy of Combustion (MJ/mol) | 7.18    | 7.23 |
| Compound                        | Mol (%) |      |
| R-methyldecalin                 | 35.4    | 35.4 |
| 5-methylnonane                  | 15      | 8.4  |
| 2,4-dimethylnonane              | 0       | 7.1  |
| n-dodecane                      | 18.3    | 15.8 |
| heptylcyclohexane               | 31.3    | 33.3 |
| <b>Total</b>                    | 100     | 100  |

**Table S3.** Enthalpy of combustion for surrogates Shrestha (2014) [19].

| Surrogates                      | S8      | S9    | S10   | S11   | S12   | S13   |
|---------------------------------|---------|-------|-------|-------|-------|-------|
| Enthalpy of Combustion ( MJ/kg) | 43.19   | 43.16 | 43.18 | 43.11 | 43.30 | 43.31 |
| Compound                        | Vol (%) |       |       |       |       |       |
| <b>n-dodecane</b>               | 58.0    | 60.0  | 56.0  | 56.0  | 51.0  | 51.0  |
| <b>iso-Cetane</b>               | -       | -     | -     | -     | 9.0   | 11.0  |
| <b>Decalin</b>                  | -       | -     | 11.0  | 13.0  | 28.0  | 25.0  |
| <b>n-Propylbenzene</b>          | 42.0    | -     | 33.0  | -     | 12.0  | -     |
| <b>1,2,4-trimethylbenzene</b>   | -       | 40.0  | -     | 31.0  | -     | 13.0  |
| <b>Total</b>                    | 100     | 100   | 100   | 100   | 100   | 100   |

**Table S4.** Enthalpy of combustion for surrogates Kalghatgi et al. (2011) [20].

| Surrogates                     | S14     | S15  | S16  |
|--------------------------------|---------|------|------|
| Enthalpy of Combustion (MJ/kg) | 44.4    | 41.7 | 43.2 |
| Compound                       | Vol (%) |      |      |
| <b>Iso-octane</b>              | 84.0    | -    | 50.0 |
| <b>n-heptane</b>               | 16.0    | 35.0 | 24.0 |
| <b>Toluene</b>                 | -       | 65.0 | 26.0 |
| <b>Total</b>                   | 100     | 100  | 100  |

**Table S5.** Enthalpy of combustion for surrogates Huber et al. (2010) [21].

| Surrogates                      | S17     | S18  |
|---------------------------------|---------|------|
| Enthalpy of Combustion (MJ/mol) | 6.55    | 6.76 |
| Compound                        | Mol (%) |      |
| <b>n-hexylcyclohexane</b>       | -       | 26.8 |
| <b>n-heptylcyclohexane</b>      | 27.9    | -    |
| <b>1-methyldecalin</b>          | 1.3     | 6.4  |
| <b>5-methylnonane</b>           | 16.5    | 13.0 |
| <b>2-methyldecane</b>           | 15.4    | 28.4 |

|               |      |      |
|---------------|------|------|
| n-tetradecane | 5.7  | 3.5  |
| n-hexadecane  | 3.3  | -    |
| ortho-xylene  | 7.1  | 9.4  |
| Tetralin      | 22.8 | 12.5 |
| Total         | 100  | 100  |

Table S6. Enthalpy of combustion for surrogates Eddings et al. (2005) [22].

| Surrogates                     | S19     | S20  |
|--------------------------------|---------|------|
| Enthalpy of Combustion (MJ/kg) | 44.5    | 44.6 |
| Compound                       | Mol (%) |      |
| n-octane                       | 3.5     | 3.0  |
| n-dodecane                     | 40.0    | 30.0 |
| n-hexadecane                   | 5.0     | 12.0 |
| Xylene                         | 8.5     | 15.0 |
| Tetralin                       | 8.0     | 13.0 |
| Decalin                        | 35.0    | 27.0 |
| Total                          | 100     | 100  |

Table S7. Enthalpy of combustion for surrogates Naik et al. (2010) [23].

| Surrogates                     | S21     | S22   |
|--------------------------------|---------|-------|
| Enthalpy of Combustion (MJ/kg) | 44.55   | 44.45 |
| Compounds                      | Mol (%) |       |
| iso-Octane                     | 28.0    | 33.0  |
| n-octane                       | 61.0    | 25.0  |
| n-dodecane                     | 11.0    | 42.0  |
| Total                          | 100.0   | 100.0 |

Table S8. Enthalpy of combustion for surrogates Grubinger et al. (2021) [24].

| Surrogates                     | S23     | S24   | S25   |
|--------------------------------|---------|-------|-------|
| Enthalpy of Combustion (MJ/kg) | 44.79   | 43.32 | 41.4  |
| Compounds                      | Mol (%) |       |       |
| n-butane                       | 6.46    | -     | -     |
| iso-pentane                    | 17.50   | -     | 32.78 |
| 1-pentene                      | -       | 15.77 | -     |
| n-hexane                       | 21.08   | 22.89 | -     |
| Ethanol                        | -       | -     | 10.01 |
| Cyclohexane                    | -       | -     | 18.69 |
| iso-octane                     | 43.85   | 13.88 | 8.20  |
| Toluene                        | -       | 10.71 | -     |
| m-Xylene                       | 8.57    | 29.02 | 24.75 |
| t-decalin                      | 2.55    | -     | 5.58  |
| n-pentylbenzene                | -       | 7.73  | -     |
| Total                          | 100     | 100   | 100   |

Table S9. Enthalpy of combustion for surrogates Xu et al. (2015) [25].

| Surrogate                      | S26     | S27   | S28   | S29   | S30   | S31   | S32   | S33   | S34   |
|--------------------------------|---------|-------|-------|-------|-------|-------|-------|-------|-------|
| Enthalpy of Combustion (MJ/kg) | 43.17   | 43.12 | 42.94 | 43.90 | 43.46 | 43.22 | 43.79 | 42.98 | 43.30 |
| Compound                       | Mol (%) |       |       |       |       |       |       |       |       |
| 1,2,4-trimethylbenzene         | 16.40   | 23.42 | 27.35 | -     | 28.45 | 19.85 | -     | 34.38 | -     |
| iso-undecane                   | 37.33   | -     | -     | -     | -     | -     | 24.70 | -     | -     |
| n-undecane                     | 25.22   | 19.33 | -     | -     | -     | -     | -     | -     | -     |
| butyl-cyclohexane              | 21.05   | -     | -     | -     | -     | -     | -     | -     | -     |
| iso-dodecane                   | -       | 26.09 | -     | 86.49 | -     | -     | 43.85 | -     | 16.18 |
| pentyl-cyclohexane             | -       | 31.16 | -     | -     | -     | -     | -     | -     | -     |
| iso-tridecane                  | -       | -     | 15.71 | -     | -     | -     | -     | -     | -     |
| n-dodecane                     | -       | -     | 13.02 | -     | -     | 9.44  | -     | -     | -     |
| hexylcyclohexane               | -       | -     | 29.72 | -     | -     | -     | -     | -     | 60.73 |
| methyl-dicyclohexane           | -       | -     | 14.21 | -     | -     | 22.43 | -     | -     | -     |
| iso-hexadecane                 | -       | -     | -     | 13.51 | -     | -     | 4.88  | -     | -     |
| iso-tetradecane                | -       | -     | -     | -     | 71.55 | -     | -     | -     | -     |
| iso-pentadecane                | -       | -     | -     | -     | -     | 37.56 | -     | -     | -     |
| dicyclohexane                  | -       | -     | -     | -     | -     | 10.72 | -     | -     | 23.09 |
| iso-nonane                     | -       | -     | -     | -     | -     | -     | 8.72  | -     | -     |
| iso-denane                     | -       | -     | -     | -     | -     | -     | 17.85 | 48.90 | -     |
| n-denane                       | -       | -     | -     | -     | -     | -     | -     | 16.72 | -     |
| Total                          | 100     | 100   | 100   | 100   | 100   | 100   | 100   | 100   | 100   |

Table S10. Enthalpy of combustion for surrogates Grubinger et al. (2021) [24].

| Surrogate                         | S35     | S36  | S37  | S38  |
|-----------------------------------|---------|------|------|------|
| Enthalpy of Combustion (MJ/kg)    | 32.6    | 30.5 | 28.7 | 43.9 |
| Compounds                         | Vol (%) |      |      |      |
| 1,1,3,3 tetraethoxy-propane       | 70.0    | -    | -    | -    |
| 2,2,4,4,6,8,8 heptamethyl-nonane  | 30.0    | 20.0 | -    | 23.5 |
| tri-propylene-glycol-methyl-ether | -       | 80.0 | -    | -    |
| dibutyl-maleate                   | -       | -    | 88.0 | -    |
| normal hexadecane                 | -       | -    | 7.0  | 76.5 |
| 2-ethylhexyl-nitrate              | -       | -    | 5.0  | -    |
| Total                             | 100     | 100  | 100  | 100  |
